# Supplementary material for: Associations of Serum Liver Function Markers With Brain Structure, Function, and Perfusion in Healthy Young Adults
Source: PubMed Central journal article supplement (PMC7947675; doi:10.3389/fneur.2021.606094), 2021-02-25
Supplement: Data_Sheet_1.pdf [file Data_Sheet_1.pdf]

## Supplementary materials

### Tables

**Table S1.** The correlations between serum proteins and GMV after excluding the outliers

| Serum proteins | Brain regions          | <i>pr</i> | <i>p</i> |
|----------------|------------------------|-----------|----------|
| ALB (g/L)      | L-parahippocamal gyrus | 0.235     | 0.003    |
| ALB (g/L)      | L-amygdala             | 0.215     | 0.007    |
| GLO (g/L)      | L-olfactory cortex     | -0.180    | 0.026    |
| GLO (g/L)      | R-olfactory cortex     | -0.238    | 0.003    |
| GLO (g/L)      | L-parahippocamal gyrus | -0.267    | 0.001    |
| GLO (g/L)      | R-parahippocamal gyrus | -0.269    | 0.001    |
| A/G ratio      | L-olfactory cortex     | 0.210     | 0.009    |
| A/G ratio      | R-olfactory cortex     | 0.224     | 0.005    |
| A/G ratio      | L-parahippocamal gyrus | 0.350     | < 0.001  |
| A/G ratio      | R-parahippocamal gyrus | 0.293     | < 0.001  |

Abbreviations: GMV, gray matter volume; ALB, albumin; GLO, globulin; A/G, albumin/globulin; *pr*, partial correlation coefficient; L, left; R, right.

**Table S2.** The correlations between serum bilirubin and ReHo after excluding the outliers

| Serum bilirubin            | Brain regions              | <i>pr</i> | <i>p</i> |
|----------------------------|----------------------------|-----------|----------|
| TBIL ( $\mu\text{mol/L}$ ) | L-precuneus                | 0.174     | 0.032    |
| TBIL ( $\mu\text{mol/L}$ ) | R-middle cingulate gyrus   | 0.243     | 0.003    |
| TBIL ( $\mu\text{mol/L}$ ) | R-caudate nucleus          | -0.213    | 0.008    |
| DBIL ( $\mu\text{mol/L}$ ) | L-inferior parietal lobule | 0.245     | 0.002    |
| DBIL ( $\mu\text{mol/L}$ ) | L-supramarginal gyrus      | 0.262     | 0.001    |
| DBIL ( $\mu\text{mol/L}$ ) | L-precuneus                | 0.255     | 0.001    |
| DBIL ( $\mu\text{mol/L}$ ) | R-middle cingulate gyrus   | 0.242     | 0.003    |
| IBIL ( $\mu\text{mol/L}$ ) | R-middle cingulate gyrus   | 0.237     | 0.003    |
| IBIL ( $\mu\text{mol/L}$ ) | R-caudate nucleus          | -0.239    | 0.003    |

Abbreviations: ReHo, regional homogeneity; TBIL, total bilirubin; DBIL, direct bilirubin; IBIL, indirect bilirubin; *pr*, partial correlation coefficient; L, left; R, right.

**Table S3.** The correlations between serum ALT and CBF after excluding the outliers

| Serum ALT | Brain regions            | <i>pr</i> | <i>p</i> |
|-----------|--------------------------|-----------|----------|
| ALT (U/L) | L-superior frontal gyrus | 0.212     | 0.009    |
| ALT (U/L) | R-superior frontal gyrus | 0.186     | 0.023    |
| ALT (U/L) | R-middle occipital gyrus | -0.194    | 0.017    |
| ALT (U/L) | R-angular gyrus          | -0.221    | 0.007    |
| ALT (U/L) | R-precuneus              | -0.214    | 0.009    |
| ALT (U/L) | R-middle temporal gyrus  | -0.198    | 0.015    |

Abbreviations: ALT, alanine transaminase; CBF, cerebral blood flow; *pr*, partial correlation coefficient; L, left; R, right.

**Table S4.** The correlations between serum proteins and GMV after additional adjustment for education

| Serum proteins | Brain regions          | <i>pr</i> | <i>p</i> |
|----------------|------------------------|-----------|----------|
| ALB (g/L)      | L-parahippocamal gyrus | 0.235     | 0.003    |
| ALB (g/L)      | L-amygdala             | 0.214     | 0.008    |
| GLO (g/L)      | L-olfactory cortex     | -0.248    | 0.002    |
| GLO (g/L)      | R-olfactory cortex     | -0.282    | < 0.001  |
| GLO (g/L)      | L-parahippocamal gyrus | -0.291    | < 0.001  |
| GLO (g/L)      | R-parahippocamal gyrus | -0.301    | < 0.001  |
| A/G ratio      | L-olfactory cortex     | 0.22      | 0.006    |
| A/G ratio      | R-olfactory cortex     | 0.237     | 0.003    |
| A/G ratio      | L-parahippocamal gyrus | 0.344     | < 0.001  |
| A/G ratio      | R-parahippocamal gyrus | 0.296     | < 0.001  |

Abbreviations: GMV, gray matter volume; ALB, albumin; GLO, globulin; A/G, albumin/globulin; *pr*, partial correlation coefficient; L, left; R, right.

**Table S5.** The correlations between serum bilirubin and ReHo after additional adjustment for education

| Serum bilirubin            | Brain regions              | <i>pr</i> | <i>p</i> |
|----------------------------|----------------------------|-----------|----------|
| TBIL ( $\mu\text{mol/L}$ ) | L-precuneus                | 0.214     | 0.008    |
| TBIL ( $\mu\text{mol/L}$ ) | R-middle cingulate gyrus   | 0.219     | 0.007    |
| TBIL ( $\mu\text{mol/L}$ ) | R-caudate nucleus          | -0.216    | 0.007    |
| DBIL ( $\mu\text{mol/L}$ ) | L-inferior parietal lobule | 0.245     | 0.002    |
| DBIL ( $\mu\text{mol/L}$ ) | L-supramarginal gyrus      | 0.232     | 0.004    |
| DBIL ( $\mu\text{mol/L}$ ) | L-precuneus                | 0.246     | 0.002    |
| DBIL ( $\mu\text{mol/L}$ ) | R-middle cingulate gyrus   | 0.21      | 0.009    |
| IBIL ( $\mu\text{mol/L}$ ) | R-middle cingulate gyrus   | 0.212     | 0.009    |
| IBIL ( $\mu\text{mol/L}$ ) | R-caudate nucleus          | -0.237    | 0.003    |

Abbreviations: ReHo, regional homogeneity; TBIL, total bilirubin; DBIL, direct bilirubin; IBIL, indirect bilirubin; *pr*, partial correlation coefficient; L, left; R, right.

**Table S6.** The correlations between serum ALT and CBF after additional adjustment for education

| Serum ALT | Brain regions            | <i>pr</i> | <i>p</i> |
|-----------|--------------------------|-----------|----------|
| ALT (U/L) | L-superior frontal gyrus | 0.272     | 0.001    |
| ALT (U/L) | R-superior frontal gyrus | 0.226     | 0.005    |
| ALT (U/L) | R-middle occipital gyrus | -0.24     | 0.003    |
| ALT (U/L) | R-angular gyrus          | -0.228    | 0.005    |
| ALT (U/L) | R-precuneus              | -0.263    | 0.001    |
| ALT (U/L) | R-middle temporal gyrus  | -0.275    | 0.001    |

Abbreviations: ALT, alanine transaminase; CBF, cerebral blood flow; *pr*, partial correlation coefficient; L, left; R, right.
